# Supplementary material for: Accuracy of computer-aided design models of the jaws produced using ultra-low MDCT doses and ASIR and MBIR
Source: Springer Nature journal article supplement (doi:10.1007/s11548-018-1809-4), 2018-06-16

**Accuracy of CAD Models of the Jaws Produced Using Ultra-low MDCT Doses and ASIR and MBIR**

**International Journal of Computer Assisted Radiology and Surgery**

Asma'a A. Al-Ekrish (corresponding author), BDS, MDS, Cert. Diag. Sci.

King Saud University, Department of Oral Medicine and Diagnostic Sciences

E-mail: [aalekrish@ksu.edu.sa](mailto:aalekrish@ksu.edu.sa); [asma.alekrish@gmail.com](mailto:asma.alekrish@gmail.com)

Sara A. Alfadda, BDS, MSc, PhD, FRCD(C),

Wadea Ameen, MSC, PhD candidate

Romed Hörmann, Research Assistant

Wolfgang Puelacher, MD, DMD

Gerlig Widmann, MD, EBIR

**Electronic supplementary material 2. Color coded analysis demonstrating the location, magnitude and direction of the deviations between each test model and the reference model (in mm) (see color scale on the side).**

Filtered Backprojection

ASIR 50

ASIR 100

MBIR

Test protocol 1

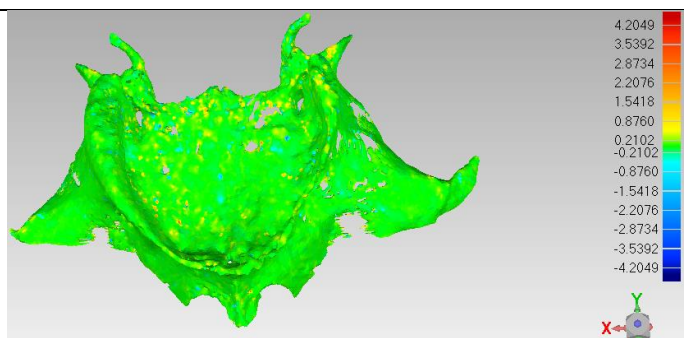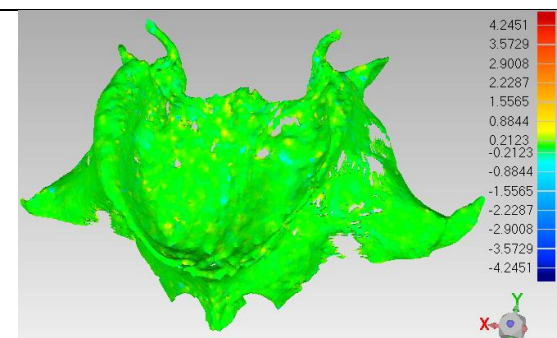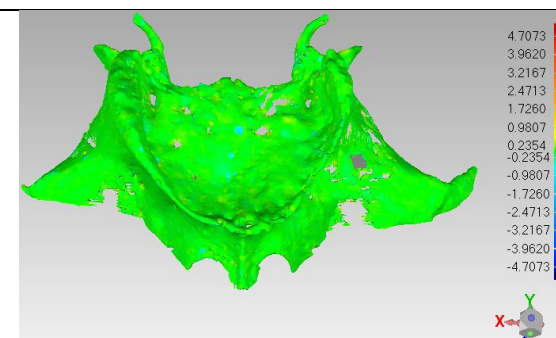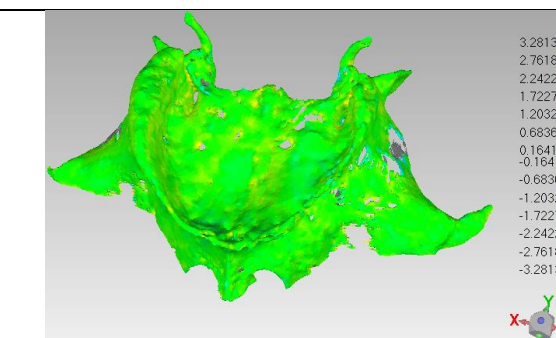

Test protocol 2

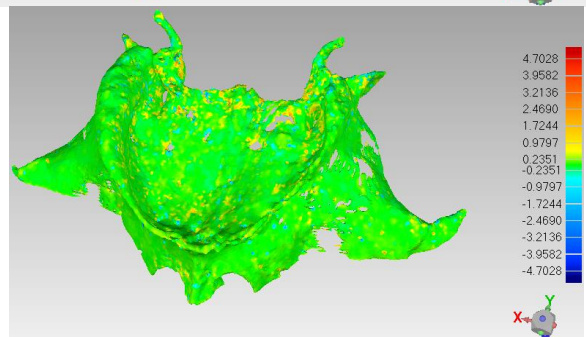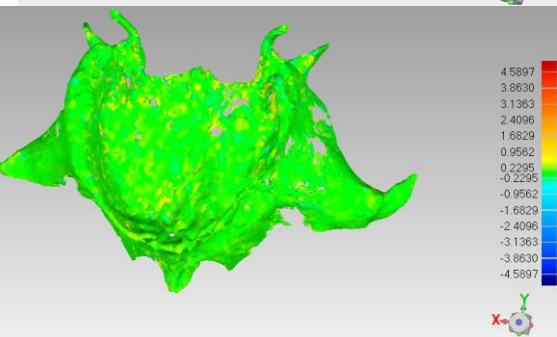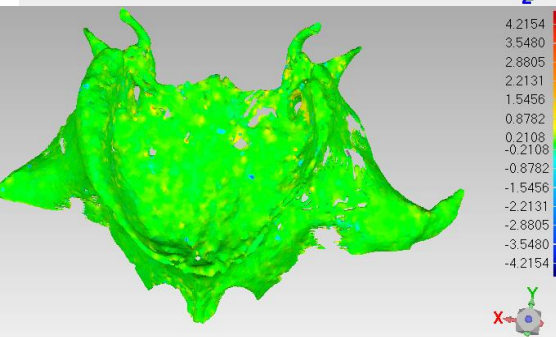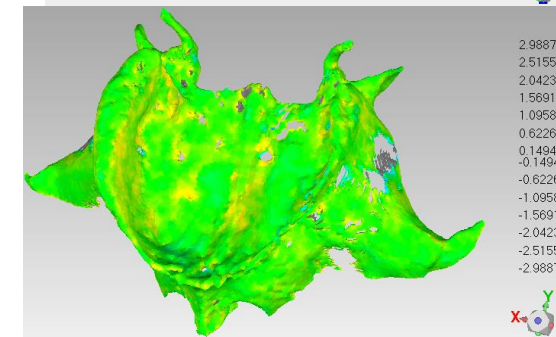

Test protocol 3

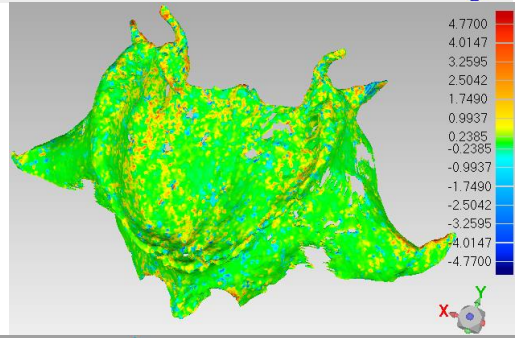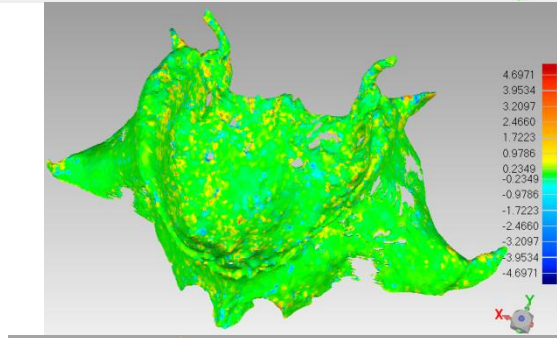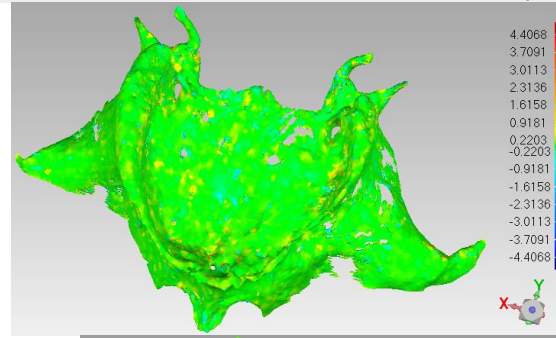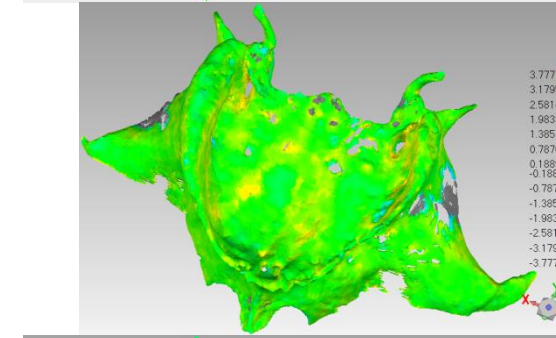

Test protocol 4

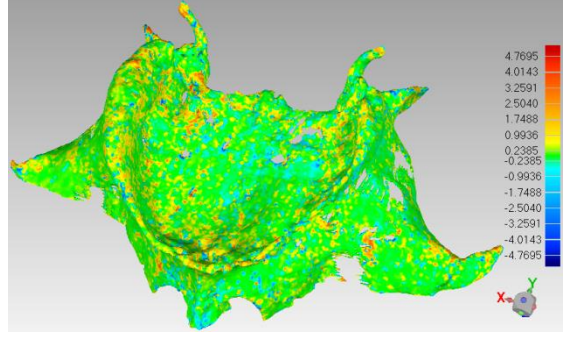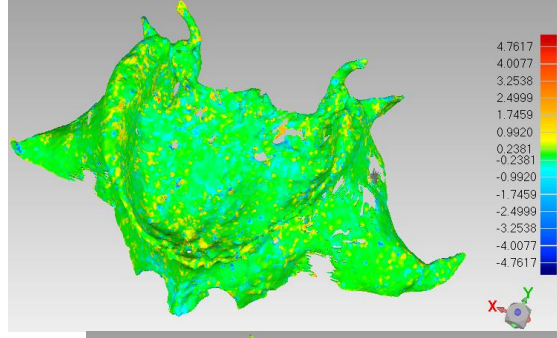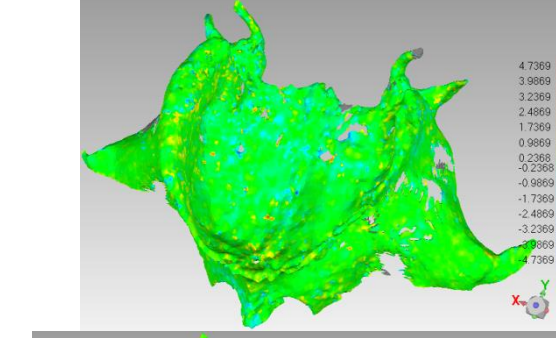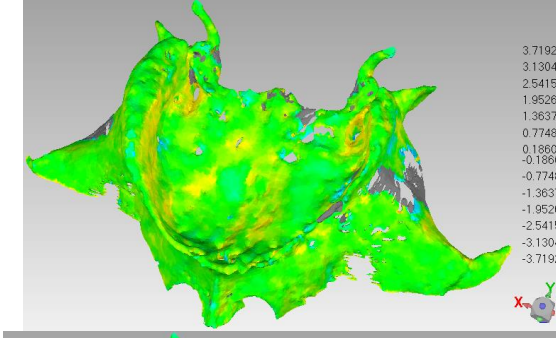

Test protocol 5

Analysis not performed due to inability to segment the maxilla.

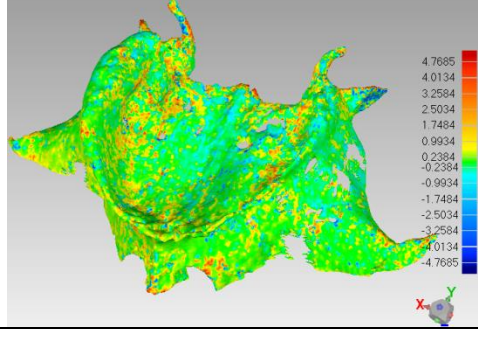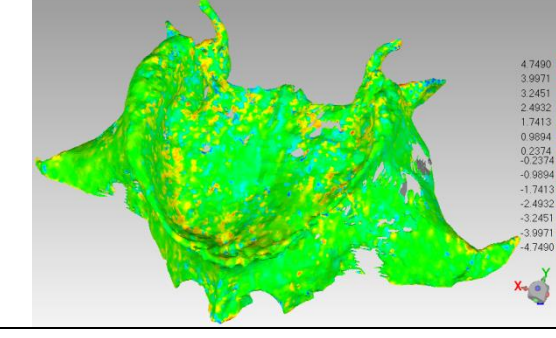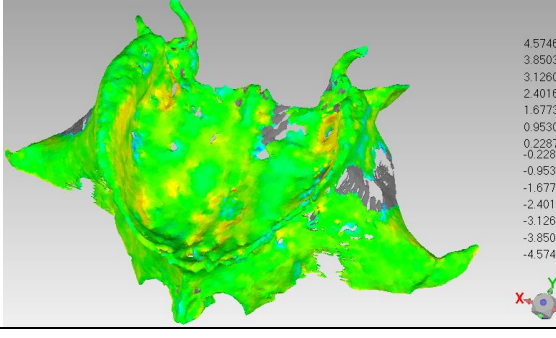

Supplement: MOESM2 [file 15851866]
