# Supplementary material for: Accuracy of computer-aided design models of the jaws produced using ultra-low MDCT doses and ASIR and MBIR
Source: Springer Nature journal article supplement (doi:10.1007/s11548-018-1809-4), 2018-06-16

Asma'a A. Al-Ekrish (corresponding author), BDS, MDS, Cert. Diag. Sci.

King Saud University, Department of Oral Medicine and Diagnostic Sciences

E-mail: [aalekrish@ksu.edu.sa](mailto:aalekrish@ksu.edu.sa); [asma.alekrish@gmail.com](mailto:asma.alekrish@gmail.com)

Sara A. Alfadda, BDS, MSc, PhD, FRCD(C),

Wadea Ameen, MSC, PhD candidate

Romed Hörmann, Research Assistant

Wolfgang Puelacher, MD, DMD

Gerlig Widmann, MD, EBIR

**Electronic supplementary material 1:** The CAD models obtained by the reference protocol and the different combinations of test protocols (TP) and reconstruction techniques.

**Reference Model (Reference Dose FBP)**

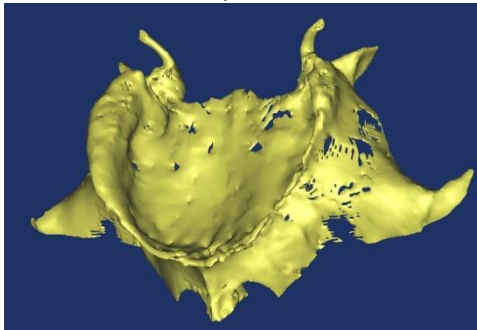

**Filtered Backprojection**

**ASIR 50**

**ASIR 100**

**MBIR**

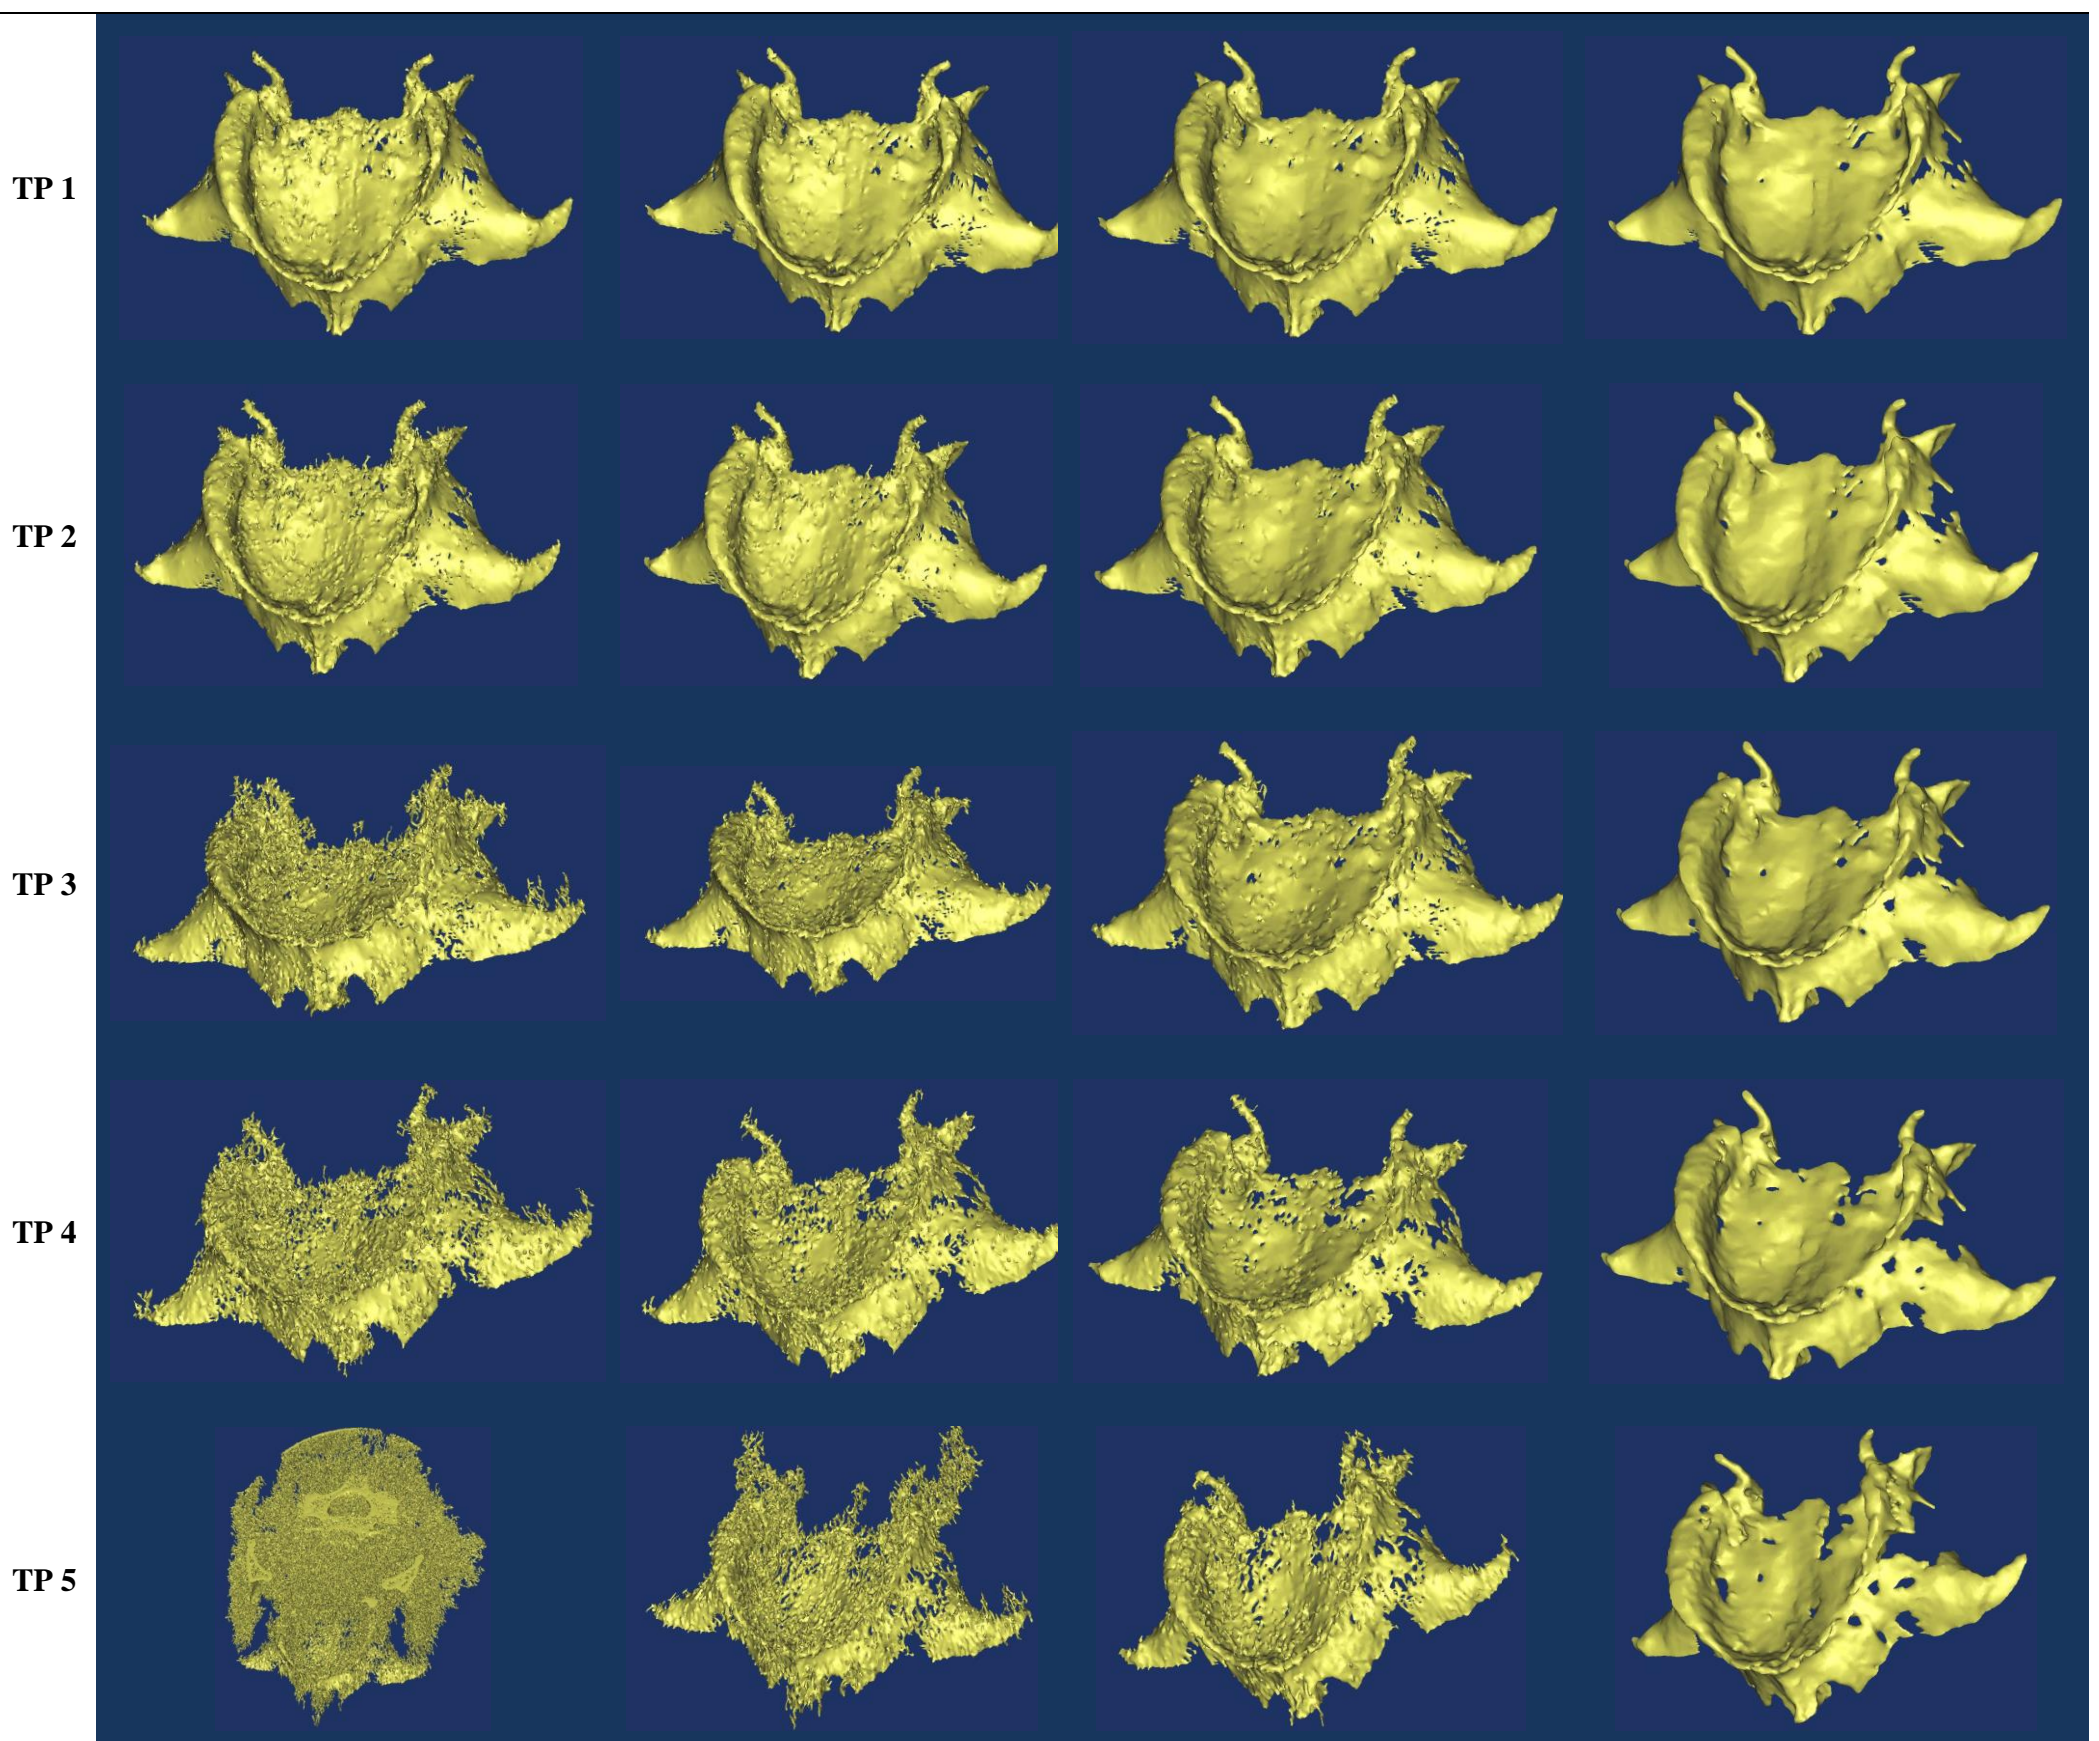

Supplement: MOESM1 [file 15851214]
